# Supplementary material
Source: PubMed Central journal article supplement (PMC4472566)
Supplement: NIHMS669621-supplement-01.pdf [file NIHMS669621-supplement-01.pdf]

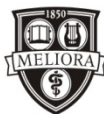

SCHOOL OF MEDICINE & DENTISTRY  
UNIVERSITY of ROCHESTER MEDICAL CENTER

**PART 2: INFECTION CONTROL & PREVENTION PRACTICES IN NURSING HOMES**

Directions: This section of the questionnaire should be filled out by the person most knowledgeable about infection control practices in your facility. Please do not leave any questions unanswered.

*Your responses to this survey will be totally confidential. Please mail the completed survey directly to the University of Rochester in the enclosed, addressed and pre-paid envelope.*

If you have any questions or need assistance in completing this questionnaire, please call:

1-585-275-0623

Monday through Friday

9:00 am – 5:00 pm (EST)

*Your participation in this survey is crucial to the success of the project!  
Please help us make it a success!*

**THANK YOU VERY MUCH FOR YOUR ASSISTANCE**

1. Title of person answering this section of the survey \_\_\_\_\_
2. At your facility, how many **total hours per week** are routinely dedicated to infection control/prevention duties? (e.g. surveillance, policies, campaigns, education, enforcement)  
\_\_\_\_\_
3. On average, how many resident rooms are assigned to a single environmental cleaning staff member for daily cleaning? (e.g. one staff member is assigned 15 rooms daily)  
\_\_\_\_\_ rooms per staff member

|                                                                                           |                                                                                                                                                                          |                          |                                       |                          |
|-------------------------------------------------------------------------------------------|--------------------------------------------------------------------------------------------------------------------------------------------------------------------------|--------------------------|---------------------------------------|--------------------------|
| <b>4.</b>                                                                                 | Please answer the following questions about whether resident rooms on contact precautions are cleaned differently compared to rooms that are not on contact precautions? |                          |                                       |                          |
| <b>(Please check ALL that apply for each pathogen where contact precautions are used)</b> |                                                                                                                                                                          |                          |                                       |                          |
|                                                                                           |                                                                                                                                                                          | <b>MRSA<sup>1</sup></b>  | <b><i>C difficile</i><sup>2</sup></b> | <b>ESBL<sup>3</sup></b>  |
| a.                                                                                        | Not applicable. We do not use contact precautions for this pathogen.                                                                                                     | <input type="checkbox"/> | <input type="checkbox"/>              | <input type="checkbox"/> |
| b.                                                                                        | Rooms are cleaned identically to rooms without contact precautions                                                                                                       | <input type="checkbox"/> | <input type="checkbox"/>              | <input type="checkbox"/> |
| c.                                                                                        | Rooms are cleaned with different product                                                                                                                                 | <input type="checkbox"/> | <input type="checkbox"/>              | <input type="checkbox"/> |
|                                                                                           |                                                                                                                                                                          | _____                    | _____                                 | _____                    |
|                                                                                           |                                                                                                                                                                          | Specify Product          | Specify Product                       | Specify Product          |
| d.                                                                                        | Rooms are cleaned last each day                                                                                                                                          | <input type="checkbox"/> | <input type="checkbox"/>              | <input type="checkbox"/> |
| e.                                                                                        | Rooms are cleaned more frequently than daily                                                                                                                             | <input type="checkbox"/> | <input type="checkbox"/>              | <input type="checkbox"/> |
| f.                                                                                        | More room items are cleaned on daily cleaning                                                                                                                            | <input type="checkbox"/> | <input type="checkbox"/>              | <input type="checkbox"/> |
| g.                                                                                        | More room items are cleaned on discharge cleaning                                                                                                                        | <input type="checkbox"/> | <input type="checkbox"/>              | <input type="checkbox"/> |
| h.                                                                                        | Disinfectant is left on surfaces longer                                                                                                                                  | <input type="checkbox"/> | <input type="checkbox"/>              | <input type="checkbox"/> |

<sup>1</sup> Methicillin Resistant *Staphylococcus aureus*

<sup>2</sup> *Clostridium difficile*

<sup>3</sup> Extended Spectrum Beta-Lactamase producer (usually ESBL *E. coli* or ESBL Klebsiella)

|           |                                                                                                                                         |                                                                                                  |                                                                                               |                                                            |
|-----------|-----------------------------------------------------------------------------------------------------------------------------------------|--------------------------------------------------------------------------------------------------|-----------------------------------------------------------------------------------------------|------------------------------------------------------------|
| <b>5.</b> | Please indicate the contact isolation strategies routinely used for residents who are known to have MRSA (please check all that apply): |                                                                                                  |                                                                                               |                                                            |
|           |                                                                                                                                         | <b>MRSA infected resident, on antibiotics, WITH draining wounds or WITH respiratory symptoms</b> | <b>MRSA infected resident, on antibiotics, NO draining wounds and NO respiratory symptoms</b> | <b>Resident who is a MRSA carrier, but is NOT infected</b> |
| a.        | Private room whenever possible or cohort with another MRSA resident                                                                     | <input type="checkbox"/>                                                                         | <input type="checkbox"/>                                                                      | <input type="checkbox"/>                                   |
| b.        | Gloves to enter room                                                                                                                    | <input type="checkbox"/>                                                                         | <input type="checkbox"/>                                                                      | <input type="checkbox"/>                                   |
| c.        | Gloves only if resident contact                                                                                                         | <input type="checkbox"/>                                                                         | <input type="checkbox"/>                                                                      | <input type="checkbox"/>                                   |
| d.        | Gown to enter room                                                                                                                      | <input type="checkbox"/>                                                                         | <input type="checkbox"/>                                                                      | <input type="checkbox"/>                                   |
| e.        | Gown only if resident contact                                                                                                           | <input type="checkbox"/>                                                                         | <input type="checkbox"/>                                                                      | <input type="checkbox"/>                                   |
| f.        | Mask when near resident                                                                                                                 | <input type="checkbox"/>                                                                         | <input type="checkbox"/>                                                                      | <input type="checkbox"/>                                   |
| g.        | Use of disposable/dedicated patient care equipment                                                                                      | <input type="checkbox"/>                                                                         | <input type="checkbox"/>                                                                      | <input type="checkbox"/>                                   |
| h.        | Resident asked to wear gown when leaving room                                                                                           | <input type="checkbox"/>                                                                         | <input type="checkbox"/>                                                                      | <input type="checkbox"/>                                   |
| i.        | Resident asked to refrain from group social activities                                                                                  | <input type="checkbox"/>                                                                         | <input type="checkbox"/>                                                                      | <input type="checkbox"/>                                   |
| j.        | Resident restricted from group physical therapy                                                                                         | <input type="checkbox"/>                                                                         | <input type="checkbox"/>                                                                      | <input type="checkbox"/>                                   |
| k.        | Resident asked to eat in room                                                                                                           | <input type="checkbox"/>                                                                         | <input type="checkbox"/>                                                                      | <input type="checkbox"/>                                   |

|           |                                                                                                                                                          |                                                 |
|-----------|----------------------------------------------------------------------------------------------------------------------------------------------------------|-------------------------------------------------|
| <b>6.</b> | <b>Today in your facility</b> , please indicate the number of residents (excluding dedicated psychiatric wards) that fall into the following categories. |                                                 |
|           |                                                                                                                                                          | <b># of Residents in<br/>Nursing Home TODAY</b> |
| a.        | Total census of all nursing home residents today (excluding dedicated psychiatric wards)                                                                 | _____                                           |
| b.        | Residents with active MRSA infection on antibiotic therapy to treat MRSA                                                                                 | _____                                           |
| c.        | Residents known to have MRSA, both infection and colonization                                                                                            | _____                                           |
| d.        | Residents on contact precautions for MRSA                                                                                                                | _____                                           |
| e.        | Residents with active <i>C difficile</i> infection, on antibiotic therapy to treat <i>C difficile</i>                                                    | _____                                           |
| f.        | Residents known to have <i>C difficile</i> , both infection and colonization                                                                             | _____                                           |
| g.        | Residents on contact precautions for <i>C difficile</i>                                                                                                  | _____                                           |
| h.        | Residents with active ESBL infection on antibiotic therapy to treat ESBL                                                                                 | _____                                           |
| i.        | Residents known to have ESBL, both infection and colonization                                                                                            | _____                                           |
| j.        | Residents on contact precautions for ESBL                                                                                                                | _____                                           |

7. Do you perform routine screening for MRSA on admission? <sub>1</sub> Yes <sub>0</sub> No

a. **If yes**, for which body sites do you routinely perform screening?  
(please check ALL that apply)

- Nares
- Wounds
- Axilla
- Groin
- Throat

b. **If no**, please indicate the reason(s) why?  
(please check ALL that apply)

- Cost
- Impact on staff time
- Not required by regulatory agencies
- Very little MRSA at our facility
- A positive result would not change care
- Never considered
- Other Please specify \_\_\_\_\_

|                                                                                                                                                                                     |                                                                                                                                                                                                                                    |                            |                             |                            |                            |
|-------------------------------------------------------------------------------------------------------------------------------------------------------------------------------------|------------------------------------------------------------------------------------------------------------------------------------------------------------------------------------------------------------------------------------|----------------------------|-----------------------------|----------------------------|----------------------------|
| <b>Some physicians or nursing home policies may use mupirocin nasal ointment or chlorhexidine baths to try to get rid of MRSA in the nose or on the skin (decolonize carriers).</b> |                                                                                                                                                                                                                                    |                            |                             |                            |                            |
| 8.                                                                                                                                                                                  | What percent of your MRSA+ residents are decolonized with either mupirocin, chlorhexidine or both? _____                                                                                                                           |                            |                             |                            |                            |
| 9.                                                                                                                                                                                  | All else being equal, compared to residents who have neither antibiotic resistant organisms nor <i>C difficile</i> , how likely is your facility to accept the following patients?<br>(Check single best answer for each pathogen) |                            |                             |                            |                            |
|                                                                                                                                                                                     |                                                                                                                                                                                                                                    | <b>Equally likely</b>      | <b>Somewhat less likely</b> | <b>Much less likely</b>    | <b>Will not accept</b>     |
| a.                                                                                                                                                                                  | MRSA <sup>1</sup>                                                                                                                                                                                                                  | <input type="checkbox"/> 1 | <input type="checkbox"/> 2  | <input type="checkbox"/> 3 | <input type="checkbox"/> 4 |
| b.                                                                                                                                                                                  | <i>C difficile</i> <sup>2</sup>                                                                                                                                                                                                    | <input type="checkbox"/> 1 | <input type="checkbox"/> 2  | <input type="checkbox"/> 3 | <input type="checkbox"/> 4 |
| c.                                                                                                                                                                                  | ESBL <sup>3</sup>                                                                                                                                                                                                                  | <input type="checkbox"/> 1 | <input type="checkbox"/> 2  | <input type="checkbox"/> 3 | <input type="checkbox"/> 4 |

|     |                                                                                                                                                                 |                          |                                       |                          |
|-----|-----------------------------------------------------------------------------------------------------------------------------------------------------------------|--------------------------|---------------------------------------|--------------------------|
| 10. | If your facility is less likely to, or will not at all, accept residents with specific pathogens, please check all reasons why<br>(please check ALL that apply) |                          |                                       |                          |
|     |                                                                                                                                                                 | <b>MRSA<sup>1</sup></b>  | <b><i>C difficile</i><sup>2</sup></b> | <b>ESBL<sup>3</sup></b>  |
| a.  | Formal policy to not accept patients with this pathogen                                                                                                         | <input type="checkbox"/> | <input type="checkbox"/>              | <input type="checkbox"/> |
| b.  | Unwritten/informal policy to not accept patients with this pathogen                                                                                             | <input type="checkbox"/> | <input type="checkbox"/>              | <input type="checkbox"/> |
| c.  | Single room not always available                                                                                                                                | <input type="checkbox"/> | <input type="checkbox"/>              | <input type="checkbox"/> |
| d.  | Cohort room not always available                                                                                                                                | <input type="checkbox"/> | <input type="checkbox"/>              | <input type="checkbox"/> |
| e.  | Patients often require a higher level of care that is not available at our facility                                                                             | <input type="checkbox"/> | <input type="checkbox"/>              | <input type="checkbox"/> |
| f.  | Other                                                                                                                                                           | <input type="checkbox"/> | <input type="checkbox"/>              | <input type="checkbox"/> |
|     | If marked other please specify reasons                                                                                                                          | _____                    | _____                                 | _____                    |
|     |                                                                                                                                                                 | _____                    | _____                                 | _____                    |
|     |                                                                                                                                                                 | _____                    | _____                                 | _____                    |
|     |                                                                                                                                                                 | _____                    | _____                                 | _____                    |
|     |                                                                                                                                                                 | MRSA                     | <i>C difficile</i>                    | ESBL                     |

<sup>1</sup> Methicillin Resistant *Staphylococcus aureus*

<sup>2</sup> *Clostridium difficile*

<sup>3</sup> Extended Spectrum Beta-Lactamase producer (usually ESBL *E. coli* or ESBL *Klebsiella*)

**THANK YOU VERY MUCH FOR COMPLETING THIS SURVEY**
